# Supplementary material for: The first evidence of global meat phosphoproteome changes in response to pre-slaughter stress
Source: PubMed Central journal article supplement (PMC6637562; doi:10.1186/s12864-019-5943-3), 2019-07-17
Supplement: 12864_2019_5943_MOESM1_ESM.pdf [file 12864_2019_5943_MOESM1_ESM.pdf]

## Supplementary Information

*BMC Genomics*

### **The first evidence of global meat phosphoproteome changes in response to pre-slaughter stress**

Ariadna Mato, Raquel Rodríguez-Vázquez, María López-Pedrouso, Susana Bravo, Daniel Franco, Carlos Zapata

Supplementary Tables 1-4

Supplementary Figures 1-2

**Table S1** Differences in *PR* over 2-DE spots between DFD and control (non-DFD) meat samples from the LT bovine muscle

| Spot no. <sup>a</sup> | DFD <i>PR</i>    |                                          |                                         | Control <i>PR</i> |                             |                                       | <i>P</i> -value <sup>d</sup> |
|-----------------------|------------------|------------------------------------------|-----------------------------------------|-------------------|-----------------------------|---------------------------------------|------------------------------|
|                       | Mean ( $\pm$ SE) | Adjusted 95% CI<br>(CL, CU) <sup>b</sup> | $P(\hat{\theta}_B \leq \hat{\theta})^c$ | Mean ( $\pm$ SE)  | Adjusted 95% CI<br>(CL, CU) | $P(\hat{\theta}_B \leq \hat{\theta})$ |                              |
| 1                     | 0.41 $\pm$ 0.10  | 0.292, 0.603                             | 0.64                                    | 0                 | N/A                         | N/A                                   | < 0.05                       |
| 2                     | 0.42 $\pm$ 0.15  | 0.159, 0.815                             | 0.56                                    | 0.45 $\pm$ 0.15   | 0.151, 0.615                | 0.63                                  | ns                           |
| 3                     | 0.30 $\pm$ 0.48  | 0.204, 0.392                             | 0.55                                    | 0.38 $\pm$ 0.10   | 0.084, 0.520                | 0.52                                  | ns                           |
| 4                     | 0.26 $\pm$ 0.03  | 0.207, 0.329                             | 0.58                                    | 0.32 $\pm$ 0.09   | 0.057, 0.434                | 0.49                                  | ns                           |
| 5                     | 0.08 $\pm$ 0.03  | 0.051, 0.108                             | 0.77                                    | 0.36 $\pm$ 0.12   | 0.169, 0.696                | 0.59                                  | < 0.05                       |
| 6                     | 0                | N/A                                      | N/A                                     | 0.12 $\pm$ 0.06   | 0.060, 0.171                | 0.72                                  | < 0.05                       |
| 7                     | 0.54 $\pm$ 0.21  | 0.206, 0.939                             | 0.64                                    | 0                 | N/A                         | N/A                                   | < 0.05                       |
| 8                     | 0.48 $\pm$ 0.08  | 0.281, 0.614                             | 0.53                                    | 0                 | N/A                         | N/A                                   | < 0.05                       |
| 9                     | 0.36 $\pm$ 0.10  | 0.153, 0.630                             | 0.55                                    | 0                 | N/A                         | N/A                                   | < 0.05                       |
| 10                    | 0.33 $\pm$ 0.06  | 0.205, 0.435                             | 0.53                                    | 0                 | N/A                         | N/A                                   | < 0.05                       |
| 11                    | 0.31 $\pm$ 0.03  | 0.238, 0.371                             | 0.49                                    | 0                 | N/A                         | N/A                                   | < 0.05                       |
| 12                    | 0.25 $\pm$ 0.03  | 0.187, 0.344                             | 0.58                                    | 0.16 $\pm$ 0.03   | 0.126, 0.238                | 0.52                                  | ns                           |
| 13                    | 0.22 $\pm$ 0.04  | 0.100, 0.293                             | 0.56                                    | 0.21 $\pm$ 0.06   | 0.087, 0.367                | 0.55                                  | ns                           |
| 14                    | 0.19 $\pm$ 0.06  | 0.062, 0.319                             | 0.58                                    | 0.21 $\pm$ 0.04   | 0.105, 0.305                | 0.57                                  | ns                           |
| 15                    | 0.35 $\pm$ 0.16  | 0.154, 0.655                             | 0.65                                    | 0                 | N/A                         | N/A                                   | < 0.05                       |
| 16                    | 0.31 $\pm$ 0.04  | 0.237, 0.379                             | 0.57                                    | 0                 | N/A                         | N/A                                   | < 0.05                       |
| 17                    | 0.45 $\pm$ 0.10  | 0.231, 0.701                             | 0.58                                    | 0.42 $\pm$ 0.08   | 0.345, 0.504                | 0.76                                  | ns                           |
| 18                    | 0                | N/A                                      | N/A                                     | 0.12 $\pm$ 0.04   | 0.067, 0.186                | 0.59                                  | < 0.05                       |
| 19                    | 0                | N/A                                      | N/A                                     | 0.15 $\pm$ 0.05   | 0.041, 0.206                | 0.57                                  | < 0.05                       |
| 20                    | 0                | N/A                                      | N/A                                     | 0.13 $\pm$ 0.02   | 0.105, 0.179                | 0.64                                  | < 0.05                       |

|     |                 |              |      |                 |              |      |        |
|-----|-----------------|--------------|------|-----------------|--------------|------|--------|
| 21  | 0               | N/A          | N/A  | $0.11 \pm 0.05$ | 0.031, 0.187 | 0.62 | < 0.05 |
| 22  | $0.70 \pm 0.12$ | 0.458, 0.948 | 0.49 | 0               | N/A          | N/A  | < 0.05 |
| 23  | $0.69 \pm 0.08$ | 0.505, 0.874 | 0.58 | 0               | N/A          | N/A  | < 0.05 |
| 24  | $0.66 \pm 0.10$ | 0.452, 0.805 | 0.52 | 0               | N/A          | N/A  | < 0.05 |
| 25  | $0.63 \pm 0.06$ | 0.447, 0.693 | 0.52 | 0               | N/A          | N/A  | < 0.05 |
| 26  | $0.72 \pm 0.19$ | 0.531, 0.904 | 0.77 | 0               | N/A          | N/A  | < 0.05 |
| 27  | 0               | N/A          | N/A  | $0.37 \pm 0.19$ | 0.175, 0.563 | 0.77 | < 0.05 |
| 28  | $0.76 \pm 0.06$ | 0.609, 0.908 | 0.54 | $0.61 \pm 0.16$ | 0.315, 0.854 | 0.60 | ns     |
| 29  | $0.61 \pm 0.05$ | 0.511, 0.721 | 0.55 | $0.78 \pm 0.04$ | 0.672, 0.871 | 0.51 | ns     |
| 30  | 0               | N/A          | N/A  | $0.73 \pm 0.19$ | 0.358, 0.929 | 0.56 | < 0.05 |
| 30A | $0.71 \pm 0.15$ | 0.402, 0.879 | 0.50 | 0               | N/A          | N/A  | < 0.05 |
| 31  | $0.14 \pm 0.06$ | 0.050, 0.304 | 0.57 | $0.27 \pm 0.06$ | 0.112, 0.357 | 0.50 | ns     |
| 32  | $0.09 \pm 0.01$ | 0.067, 0.105 | 0.51 | $0.11 \pm 0.04$ | 0.052, 0.216 | 0.58 | ns     |
| 33  | 0               | N/A          | N/A  | $0.49 \pm 0.24$ | 0.033, 0.839 | 0.61 | < 0.05 |
| 34  | $0.69 \pm 0.25$ | 0.192, 0.951 | 0.58 | 0               | N/A          | N/A  | < 0.05 |
| 35  | $0.79 \pm 0.07$ | 0.655, 0.925 | 0.55 | $0.65 \pm 0.13$ | 0.368, 0.850 | 0.47 | ns     |
| 36  | $0.56 \pm 0.12$ | 0.245, 0.771 | 0.54 | $0.61 \pm 0.18$ | 0.421, 0.976 | 0.64 | ns     |
| 37  | $0.65 \pm 0.19$ | 0.467, 0.835 | 0.75 | 0               | N/A          | N/A  | < 0.05 |
| 38  | $0.54 \pm 0.07$ | 0.347, 0.687 | 0.50 | $0.45 \pm 0.04$ | 0.328, 0.529 | 0.55 | ns     |
| 39  | $0.54 \pm 0.03$ | 0.347, 0.687 | 0.51 | $0.56 \pm 0.13$ | 0.308, 0.739 | 0.59 | ns     |
| 40  | $0.14 \pm 0.11$ | 0.035, 0.247 | 0.75 | $0.16 \pm 0.03$ | 0.091, 0.207 | 0.65 | ns     |
| 41  | $0.11 \pm 0.04$ | 0.014, 0.208 | 0.54 | $0.36 \pm 0.11$ | 0.058, 0.564 | 0.52 | ns     |
| 42  | $0.07 \pm 0.01$ | 0.049, 0.098 | 0.59 | $0.08 \pm 0.02$ | 0.043, 0.104 | 0.55 | ns     |
| 43  | $0.36 \pm 0.06$ | 0.234, 0.510 | 0.58 | $0.37 \pm 0.11$ | 0.257, 0.475 | 0.73 | ns     |
| 44  | 0               | N/A          | N/A  | $0.46 \pm 0.20$ | 0.087, 0.776 | 0.60 | < 0.05 |

|    |             |              |      |             |              |      |        |
|----|-------------|--------------|------|-------------|--------------|------|--------|
| 45 | 0.49 ± 0.12 | 0.283, 0.733 | 0.59 | 0.48 ± 0.09 | 0.307, 0.616 | 0.57 | ns     |
| 46 | 0           | N/A          | N/A  | 0.13 ± 0.03 | 0.073, 0.177 | 0.52 | < 0.05 |
| 47 | 0.54 ± 0.14 | 0.241, 0.793 | 0.53 | 0.46 ± 0.14 | 0.233, 0.744 | 0.55 | ns     |
| 48 | 0.55 ± 0.14 | 0.335, 0.802 | 0.58 | 0.62 ± 0.08 | 0.477, 0.819 | 0.51 | ns     |
| 49 | 0.77 ± 0.04 | 0.669, 0.853 | 0.53 | 0.68 ± 0.05 | 0.529, 0.758 | 0.54 | ns     |
| 50 | 0           | N/A          | N/A  | 0.09 ± 0.05 | 0.011, 0.194 | 0.67 | < 0.05 |
| 51 | 0           | N/A          | N/A  | 0.38 ± 0.14 | 0.211, 0.664 | 0.59 | < 0.05 |
| 52 | 0           | N/A          | N/A  | 0.37 ± 0.19 | 0.020, 0.764 | 0.54 | < 0.05 |
| 53 | 0.93 ± 0.05 | 0.831, 1.000 | 0.55 | 0           | N/A          | N/A  | < 0.05 |
| 54 | 0.94 ± 0.04 | 0.875, 1.000 | 0.55 | 0           | N/A          | N/A  | < 0.05 |
| 55 | 0.86 ± 0.09 | 0.663, 1.000 | 0.53 | 0.93 ± 0.07 | 0.779, 1.000 | 0.64 | ns     |
| 56 | 0.65 ± 0.20 | 0.248, 1.000 | 0.63 | 0.94 ± 0.02 | 0.889, 0.986 | 0.61 | ns     |
| 57 | 0.27 ± 0.07 | 0.128, 0.407 | 0.54 | 0.34 ± 0.22 | 0.066, 1.000 | 0.53 | ns     |
| 58 | 0.17 ± 0.08 | 0.025, 0.338 | 0.55 | 0.19 ± 0.04 | 0.105, 0.274 | 0.53 | ns     |

<sup>a</sup>Gel position of assigned spots is shown in Fig. 1. <sup>b</sup>Simultaneous non-parametric bootstrap CIs (CL, lower bound; CU, upper bound) determined by the bias-corrected percentile method (10,000 replicates) and adjusted by the Bonferroni method. <sup>c</sup>The bootstrap distribution is median biased if the probability ( $P$ ) of  $(\hat{\theta}_B \leq \hat{\theta}) \neq 0.50$ , where  $\hat{\theta}_B$  and  $\hat{\theta}$  are the bootstrap mean and the sample mean estimates, respectively. <sup>d</sup>ns, not statistically significant differences of  $PR$  between sample groups. N/A, not applicable

**Table S2.** Identification of differentially phosphorylated phosphoproteins in DFD and control meat samples from the LT bovine muscle of the Rubia Gallega breed by MALDI-TOF and MALDI/TOF-TOF MS

| Spot no.            | Type of meat | Protein identity     | Abbreviation | Accession  | Mascot Score | Match/Cov. (%) | Sequence         | Peptide | [M+H] <sup>+</sup> |
|---------------------|--------------|----------------------|--------------|------------|--------------|----------------|------------------|---------|--------------------|
| 1                   | DFD          | Phosphoglucomutase-1 | PGM1(1)      | PGM1_BOVIN | 415          | 23/45          | IAAANGIGR        |         | 842.55             |
|                     |              |                      |              |            |              |                | LLFADGSR         |         | 878.51             |
|                     |              |                      |              |            |              |                | ELLSGPNR         |         | 885.52             |
|                     |              |                      |              |            |              |                | EAIQLIVR         |         | 941.62             |
|                     |              |                      |              |            |              |                | QQFDLENK         |         | 1021.52            |
|                     |              |                      |              |            |              |                | LYIDSYEK         |         | 1030.57            |
|                     |              |                      |              |            |              |                | ELEALISDR        |         | 1045.60            |
|                     |              |                      |              |            |              |                | NIFDFNALK        |         | 1081.62            |
|                     |              |                      |              |            |              |                | LSGTGSAGATIR     |         | 1090.62            |
|                     |              |                      |              |            |              |                | ELLSGPNRLK       |         | 1126.61            |
|                     |              |                      |              |            |              |                | VSQLQEKTGR       |         | 1145.59            |
|                     |              |                      |              |            |              |                | QEATLVVGGDGR     |         | 1201.68            |
|                     |              |                      |              |            |              |                | IALYETPTGWK      |         | 1278.73            |
|                     |              |                      |              |            |              |                | IDAMHGVVGPYVK    |         | 1401.78            |
|                     |              |                      |              |            |              |                | AYQDQKPGTSGLR    |         | 1420.79            |
|                     |              |                      |              |            |              |                | YDYEEVEAEGANK    |         | 1516.73            |
|                     |              |                      |              |            |              |                | FNISNGGPAPEAITDK |         | 1630.87            |
|                     |              |                      |              |            |              |                | TGEHDFGAAFDGDGDR |         | 1666.75            |
|                     |              |                      |              |            |              |                | SMPTSGALDRVANATK |         | 1794.91            |
|                     |              |                      |              |            |              |                | IDNFEYSDPVDGSISR |         | 1813.93            |
| DGLWAVLAWLSILATR    |              | 1864.94              |              |            |              |                |                  |         |                    |
| YDYEEVEAEGANKMMK    |              | 1923.02              |              |            |              |                |                  |         |                    |
| LVIGQNGILSTPAVSCIIR |              | 2011.25              |              |            |              |                |                  |         |                    |
| 5                   | Control      | Phosphoglucomutase-1 | PGM1(2)      | PGM1_BOVIN | 552          | 20/41          | DHWQK            |         | 713.28             |
|                     |              |                      |              |            |              |                | VSQLQEK          |         | 831.40             |
|                     |              |                      |              |            |              |                | IAAANGIGR        |         | 842.45             |
|                     |              |                      |              |            |              |                | LLFADGSR         |         | 878.41             |
|                     |              |                      |              |            |              |                | ELLSGPNR         |         | 885.41             |
|                     |              |                      |              |            |              |                | EAIQLIVR         |         | 941.51             |
|                     |              |                      |              |            |              |                | QQFDLENK         |         | 1021.43            |
|                     |              |                      |              |            |              |                | LYIDSYEK         |         | 1030.43            |
|                     |              |                      |              |            |              |                | ELEALISDR        |         | 1045.47            |
|                     |              |                      |              |            |              |                | NIFDFNALK        |         | 1081.47            |
|                     |              |                      |              |            |              |                | LSGTGSAGATIR     |         | 1090.49            |
|                     |              |                      |              |            |              |                | FFGNLMDASK       |         | 1145.45            |
|                     |              |                      |              |            |              |                | QEATLVVGGDGR     |         | 1201.52            |
|                     |              |                      |              |            |              |                | IALYETPTGWK      |         | 1278.58            |
|                     |              |                      |              |            |              |                | IDAMHGVVGPYVK    |         | 1401.60            |
|                     |              |                      |              |            |              |                | AYQDQKPGTSGLR    |         | 1420.61            |
|                     |              |                      |              |            |              |                | FNISNGGPAPEAITDK |         | 1630.69            |
|                     |              |                      |              |            |              |                | TGEHDFGAAFDGDGDR |         | 1666.54            |
|                     |              |                      |              |            |              |                | IDNFEYSDPVDGSISR |         | 1813.68            |

|   |         |                         |          |            |     |       |                        |         |
|---|---------|-------------------------|----------|------------|-----|-------|------------------------|---------|
|   |         |                         |          |            |     |       | LSLCGEESFGTGS DHIR     | 1864.68 |
|   |         |                         |          |            |     |       | LVIGQNGILSTPAVSCIIR    | 2010.95 |
|   |         |                         |          |            |     |       | IAEVDAR                | 773.35  |
|   |         |                         |          |            |     |       | SLLTYGR                | 809.39  |
|   |         |                         |          |            |     |       | SGMFWLR                | 896.37  |
|   |         |                         |          |            |     |       | NRPGNALEK              | 998.47  |
|   |         |                         |          |            |     |       | EHTAYYIK               | 1024.43 |
|   |         |                         |          |            |     |       | ADLTEYLSR              | 1067.46 |
|   |         |                         |          |            |     |       | IPLAEWESR              | 1100.48 |
|   |         |                         |          |            |     |       | FTGSQICHR              | 1105.44 |
| 6 | Control | Cytochrome b-c1 complex | UQCRC1   | QCR1_BOVIN | 364 | 19/47 | MVLAAGGLEHR            | 1224.56 |
|   |         |                         |          |            |     |       | RIPLAEWESR             | 1256.58 |
|   |         |                         |          |            |     |       | LCTSATESEVLR           | 1365.56 |
|   |         |                         |          |            |     |       | EVESMG AHLNAYSTR       | 1664.63 |
|   |         |                         |          |            |     |       | LCTSATESEVLRGK         | 1790.72 |
|   |         |                         |          |            |     |       | NALVSHLDGTT PVCEDIGR   | 2053.83 |
|   |         |                         |          |            |     |       | HFSGLSGTYDEDAVPTLSPCR  | 2308.86 |
|   |         |                         |          |            |     |       | VASEQSSQPTCTVGVWIDAGSR | 2334.90 |
|   |         |                         |          |            |     |       | AVELLADIVQNC SLEDSQIEK | 2373.97 |
|   |         |                         |          |            |     |       | YFYDQCPAVAGFGPIQLPDYNI | 2720.00 |
|   |         |                         |          |            |     |       | GVPLYR                 | 704.44  |
|   |         |                         |          |            |     |       | LGELYK                 | 722.43  |
|   |         |                         |          |            |     |       | EILDSR                 | 732.42  |
|   |         |                         |          |            |     |       | SPDDPAR                | 757.38  |
|   |         |                         |          |            |     |       | YDLDFK                 | 800.42  |
|   |         |                         |          |            |     |       | YNQLMR                 | 824.45  |
|   |         |                         |          |            |     |       | LSVVDQEK               | 917.54  |
|   |         |                         |          |            |     |       | TLGPALLEK              | 941.59  |
| 7 | DFD     | Beta-enolase            | ENO3 (1) | ENOB_BOVIN | 269 | 18/39 | KLSVVDQEK              | 1045.63 |
|   |         |                         |          |            |     |       | TAIQAAGY PDK           | 1134.64 |
|   |         |                         |          |            |     |       | NGKYDLDFK              | 1179.67 |
|   |         |                         |          |            |     |       | FMIELDGTENK            | 1312.69 |
|   |         |                         |          |            |     |       | GNPTVEVDLHTAK          | 1380.79 |
|   |         |                         |          |            |     |       | IEEALGDKAVFAGR         | 1475.83 |
|   |         |                         |          |            |     |       | VVIGMDVAASEFYR         | 1556.87 |
|   |         |                         |          |            |     |       | VNQIGSVTESIQACK        | 1633.91 |
|   |         |                         |          |            |     |       | AAVPSGASTGIYEAL ELR    | 1805.05 |
|   |         |                         |          |            |     |       | LAMQEFMILPVGASSFR      | 1929.05 |
|   |         |                         |          |            |     |       | GVPLYR                 | 704.44  |
|   |         |                         |          |            |     |       | SPDDPAR                | 757.38  |
|   |         |                         |          |            |     |       | YNQLMR                 | 824.46  |
|   |         |                         |          |            |     |       | IGAEVYHHLK             | 1166.68 |
|   |         |                         |          |            |     |       | FMIELDGTENK            | 1392.76 |
|   |         |                         |          |            |     |       | IEEALGDKAVFAGR         | 1475.83 |
| 8 | DFD     | Beta-enolase            | ENO3 (2) | ENOB_BOVIN | 253 | 14/34 | VVIGMDVAASEFYR         | 1556.86 |
|   |         |                         |          |            |     |       | LAQSNWGV M VSHR        | 1557.85 |
|   |         |                         |          |            |     |       | FGANAILGVSLAVCK        | 1599.88 |

|    |     |                              |           |            |     |       |                          |         |
|----|-----|------------------------------|-----------|------------|-----|-------|--------------------------|---------|
|    |     |                              |           |            |     |       | VNQIGSVTESIQACK          | 1633.90 |
|    |     |                              |           |            |     |       | IGAEVYHHLKGVK            | 1643.94 |
|    |     |                              |           |            |     |       | YNQLMRIIEALGDK           | 1760.04 |
|    |     |                              |           |            |     |       | AAVPSGASTGIYEALRL        | 1805.04 |
|    |     |                              |           |            |     |       | LAMQEFMILPVGASSFR        | 1913.06 |
|    |     |                              |           |            |     |       | GVPLYR                   | 704.44  |
|    |     |                              |           |            |     |       | LGELYK                   | 722.44  |
|    |     |                              |           |            |     |       | EILDSR                   | 732.42  |
|    |     |                              |           |            |     |       | SPDDPAR                  | 757.38  |
|    |     |                              |           |            |     |       | YDLDFK                   | 800.42  |
|    |     |                              |           |            |     |       | YNQLMR                   | 824.45  |
|    |     |                              |           |            |     |       | RIAQAVEK                 | 914.59  |
|    |     |                              |           |            |     |       | TLGPALLEK                | 941.60  |
|    |     |                              |           |            |     |       | KLSVVDQEK                | 1045.62 |
| 9  | DFD | Beta-enolase                 | ENO3 (3)  | ENOB_BOVIN | 269 | 21/48 | TAIQAAGYPPK              | 1134.63 |
|    |     |                              |           |            |     |       | NGKYDLDFK                | 1179.67 |
|    |     |                              |           |            |     |       | FMIELDGTENK              | 1312.66 |
|    |     |                              |           |            |     |       | GNPTVEVDLHTAK            | 1380.77 |
|    |     |                              |           |            |     |       | IEEALGDKAVFAGR           | 1475.83 |
|    |     |                              |           |            |     |       | VVIGMDVAASEFYR           | 1556.85 |
|    |     |                              |           |            |     |       | FGANAILGVSLAVCK          | 1599.88 |
|    |     |                              |           |            |     |       | VNQIGSVTESIQACK          | 1633.91 |
|    |     |                              |           |            |     |       | IGAEVYHHLKGVK            | 1643.95 |
|    |     |                              |           |            |     |       | VDKFMIELDGTENK           | 1654.89 |
|    |     |                              |           |            |     |       | AAVPSGASTGIYEALRL        | 1805.05 |
|    |     |                              |           |            |     |       | LAMQEFMILPVGASSFR        | 1929.07 |
|    |     |                              |           |            |     |       | CDIDIR                   | 791.41  |
|    |     |                              |           |            |     |       | IIAPPER                  | 795.51  |
|    |     |                              |           |            |     |       | AGFAGDDAPR               | 976.50  |
|    |     |                              |           |            |     |       | GYSFVTTAER               | 1130.61 |
|    |     |                              |           |            |     |       | HQGVVMVGMGQK             | 1187.63 |
|    |     |                              |           |            |     |       | AVFPSIVGRPR              | 1198.77 |
|    |     |                              |           |            |     |       | QEYDEAGPSIVHR            | 1500.79 |
| 10 | DFD | Actin, alpha skeletal muscul | ACTA1 (1) | ACTS_BOVIN | 474 | 16/62 | DSYVGDEAQSKR             | 1514.77 |
|    |     |                              |           |            |     |       | SYELPDGQVITIGNER         | 1791.00 |
|    |     |                              |           |            |     |       | VAPEEHPTLLTEAPLNPK       | 1956.15 |
|    |     |                              |           |            |     |       | DLYANNVMSGGTTMYPGIADR    | 2262.16 |
|    |     |                              |           |            |     |       | MCDEDETTALVCDNGSGLVK     | 2294.16 |
|    |     |                              |           |            |     |       | KDLYANNVMSGGTTMYPGIAD    | 2390.27 |
|    |     |                              |           |            |     |       | LCYVALDFENEMATAAASSSLE   | 2552.29 |
|    |     |                              |           |            |     |       | TTGIVLDSGDGVTHNVPIYEGY/  | 3212.83 |
|    |     |                              |           |            |     |       | CPETLFQPSFIGMESAGIHETTYN | 3220.67 |
|    |     |                              |           |            |     |       | CDIDIR                   | 791.42  |
|    |     |                              |           |            |     |       | IIAPPER                  | 795.51  |
|    |     |                              |           |            |     |       | KGILTLK                  | 852.54  |
|    |     |                              |           |            |     |       | AGFAGDDAPR               | 976.50  |
|    |     |                              |           |            |     |       | GYSFVTTAER               | 1130.62 |

|           |         |                             |           |              |     |       |                         |         |
|-----------|---------|-----------------------------|-----------|--------------|-----|-------|-------------------------|---------|
| 11        | DFD     | Actin, alpha 1, skeletal mu | ACTA1 (2) | A4IFM8_BOVIN | 439 | 15/51 | HQGVMSGMGQK             | 1187.64 |
|           |         |                             |           |              |     |       | AVFPSIVGRPR             | 1198.78 |
|           |         |                             |           |              |     |       | QEYDEAGPSIVHR           | 1500.80 |
|           |         |                             |           |              |     |       | IWHHTFYNELR             | 1515.84 |
|           |         |                             |           |              |     |       | SYELPDGQVITIGNER        | 1791.00 |
|           |         |                             |           |              |     |       | VAPEEHPTLLTEAPLNPK      | 1956.15 |
|           |         |                             |           |              |     |       | DLYANNVMSGGTTMYPGIADR   | 2246.14 |
|           |         |                             |           |              |     |       | KDLYANNVMSGGTTMYPGIAD   | 2390.26 |
|           |         |                             |           |              |     |       | LCYVALDFENEMATAASSSSLE  | 2552.27 |
|           |         |                             |           |              |     |       | TTGIVLDSGDGVTHNVPIYEGY/ | 3196.82 |
|           |         |                             |           |              |     |       | DWPDAR                  | 759.37  |
| IEEIFK    | 778.46  |                             |           |              |     |       |                         |         |
| FCVGLQK   | 851.47  |                             |           |              |     |       |                         |         |
| FEEILTR   | 907.53  |                             |           |              |     |       |                         |         |
| LMVEMEK   | 911.53  |                             |           |              |     |       |                         |         |
| ALTLEIYK  | 950.58  |                             |           |              |     |       |                         |         |
| RFCVGLQK  | 1007.59 |                             |           |              |     |       |                         |         |
| HGGFKPTDK | 1066.60 |                             |           |              |     |       |                         |         |
| 15        | DFD     | Creatin kinase M-type       | CKM (1)   | KCRM_BOVIN   | 266 | 16/39 | GYALPPHCSR              | 1157.61 |
|           |         |                             |           |              |     |       | DLFDPIIQDR              | 1231.69 |
|           |         |                             |           |              |     |       | GQSIDDMIPAQK            | 1318.69 |
|           |         |                             |           |              |     |       | LSVEALNSLTGEFK          | 1507.79 |
|           |         |                             |           |              |     |       | GGDDLDPNYVLSSR          | 1507.79 |
|           |         |                             |           |              |     |       | LGSSEVEQQLVVDGVK        | 1786.04 |
|           |         |                             |           |              |     |       | GTGGVDTAAVGSVFDVSNADR   | 1995.05 |
|           |         |                             |           |              |     |       | RGTGGVDTAAVGSVFDVSNAD   | 2151.14 |
|           |         |                             |           |              |     |       | VISMEK                  | 722.40  |
|           |         |                             |           |              |     |       | DWPDAR                  | 759.37  |
|           |         |                             |           |              |     |       | IEEIFK                  | 778.45  |
| FCVGLQK   | 851.48  |                             |           |              |     |       |                         |         |
| FEEILTR   | 907.53  |                             |           |              |     |       |                         |         |
| LMVEMEK   | 911.52  |                             |           |              |     |       |                         |         |
| ALTLEIYK  | 950.58  |                             |           |              |     |       |                         |         |
| HGGFKPTDK | 986.55  |                             |           |              |     |       |                         |         |
| RFCVGLQK  | 1007.59 |                             |           |              |     |       |                         |         |
| 16        | DFD     | Creatin kinase M-type       | CKM (2)   | KCRM_BOVIN   | 369 | 20/49 | GYALPPHCSR              | 1157.61 |
|           |         |                             |           |              |     |       | PFGNTHNKHK              | 1179.65 |
|           |         |                             |           |              |     |       | AEEEYPDLK               | 1180.61 |
|           |         |                             |           |              |     |       | DLFDPIIQDR              | 1231.69 |
|           |         |                             |           |              |     |       | GGVHVLAHLK              | 1245.67 |
|           |         |                             |           |              |     |       | GQSIDDMIPAQK            | 1318.68 |
|           |         |                             |           |              |     |       | GGDDLDPNYVLSSR          | 1507.79 |
|           |         |                             |           |              |     |       | LSVEALNSLTGEFK          | 1507.79 |
|           |         |                             |           |              |     |       | LGSSEVEQQLVVDGVK        | 1786.04 |
|           |         |                             |           |              |     |       | GTGGVDTAAVGSVFDVSNADR   | 1995.04 |
|           |         |                             |           |              |     |       | RGTGGVDTAAVGSVFDVSNAD   | 2151.14 |
| CDIDIR    | 791.30  |                             |           |              |     |       |                         |         |



|                          |         |                                  |           |             |     |       |                          |         |
|--------------------------|---------|----------------------------------|-----------|-------------|-----|-------|--------------------------|---------|
| 18                       | Control | Actin, alpha, skeletal muscle    | ACTA1 (3) | ACTS_BOVIN  | 519 | 11/43 | IIAPPER                  | 795.40  |
|                          |         |                                  |           |             |     |       | AGFAGDDAPR               | 976.37  |
|                          |         |                                  |           |             |     |       | GYSFVTTAER               | 1130.45 |
|                          |         |                                  |           |             |     |       | HQGVMMVGMGQK             | 1187.47 |
|                          |         |                                  |           |             |     |       | QEYDEAGPSIVHR            | 1500.58 |
|                          |         |                                  |           |             |     |       | SYELPDGQVITIGNER         | 1790.74 |
|                          |         |                                  |           |             |     |       | VAPEEHPTLLTEAPLNPK       | 1955.86 |
|                          |         |                                  |           |             |     |       | DLYANNVMSGGTTMYPGIADR    | 2277.81 |
|                          |         |                                  |           |             |     |       | LCYVALDFENEMATAASSSSLEI  | 2551.88 |
|                          |         |                                  |           |             |     |       | CPETLFQPSFIGMESAGIHETTYN | 3220.24 |
| 19                       | Control | Actin, alpha, skeletal muscle    | ACTA1 (4) | ACTS_BOVIN  | 453 | 10/39 | IIAPPER                  | 795.40  |
|                          |         |                                  |           |             |     |       | AGFAGDDAPR               | 976.37  |
|                          |         |                                  |           |             |     |       | GYSFVTTAER               | 1130.45 |
|                          |         |                                  |           |             |     |       | HQGVMMVGMGQK             | 1187.47 |
|                          |         |                                  |           |             |     |       | QEYDEAGPSIVHR            | 1500.58 |
|                          |         |                                  |           |             |     |       | SYELPDGQVITIGNER         | 1790.74 |
|                          |         |                                  |           |             |     |       | VAPEEHPTLLTEAPLNPK       | 1955.87 |
|                          |         |                                  |           |             |     |       | CDEDETTALVCDNGSGLVK      | 2082.82 |
|                          |         |                                  |           |             |     |       | DLYANNVMSGGTTMYPGIADR    | 2277.79 |
|                          |         |                                  |           |             |     |       | LCYVALDFENEMATAASSSSLEI  | 2551.93 |
| 20                       | Control | Actin, alpha, skeletal muscle    | ACTA1 (5) | ACTS_BOVIN  | 423 | 12/33 | CDIDIR                   | 791.32  |
|                          |         |                                  |           |             |     |       | IIAPPER                  | 795.42  |
|                          |         |                                  |           |             |     |       | AGFAGDDAPR               | 976.39  |
|                          |         |                                  |           |             |     |       | DLTDYLMK                 | 1014.41 |
|                          |         |                                  |           |             |     |       | GYSFVTTAER               | 1130.48 |
|                          |         |                                  |           |             |     |       | HQGVMMVGMGQK             | 1203.50 |
|                          |         |                                  |           |             |     |       | QEYDEAGPSIVHR            | 1500.62 |
|                          |         |                                  |           |             |     |       | GYSFVTTAEREIVR           | 1707.65 |
|                          |         |                                  |           |             |     |       | SYELPDGQVITIGNER         | 1790.76 |
|                          |         |                                  |           |             |     |       | VAPEEHPTLLTEAPLNPK       | 1955.89 |
| DLYANNVMSGGTTMYPGIADR    | 2277.85 |                                  |           |             |     |       |                          |         |
| KDLYANNVMSGGTTMYPGIADR   | 2726.13 |                                  |           |             |     |       |                          |         |
| 21                       | Control | Actin, alpha skeletal muscle     | ACTA1 (6) | ACTS_BOVIN  | 484 | 12/53 | CDIDIR                   | 791.30  |
|                          |         |                                  |           |             |     |       | IIAPPER                  | 795.41  |
|                          |         |                                  |           |             |     |       | GYSFVTTAER               | 1130.45 |
|                          |         |                                  |           |             |     |       | HQGVMMVGMGQK             | 1187.47 |
|                          |         |                                  |           |             |     |       | QEYDEAGPSIVHR            | 1500.58 |
|                          |         |                                  |           |             |     |       | SYELPDGQVITIGNER         | 1790.74 |
|                          |         |                                  |           |             |     |       | VAPEEHPTLLTEAPLNPK       | 1955.87 |
|                          |         |                                  |           |             |     |       | MCDEDETTALVCDNGSGLVK     | 2293.83 |
|                          |         |                                  |           |             |     |       | DLYANNVMSGGTTMYPGIADR    | 2405.88 |
|                          |         |                                  |           |             |     |       | TTGIVLDSGDGVTHNVPIYEGY/  | 3212.30 |
| CPETLFQPSFIGMESAGIHETTYN | 3220.20 |                                  |           |             |     |       |                          |         |
| 22                       | DFD     | Troponin T, fast skeletal muscle | Tnnt3 (1) | TNNT3_BOVIN | 66  | 4/8   | YDITNLR                  | 894.49  |
|                          |         |                                  |           |             |     |       | VDFDDIQK                 | 979.50  |
|                          |         |                                  |           |             |     |       | FEYGEKLK                 | 1093.56 |
|                          |         |                                  |           |             |     |       | VDFDDIQKK                | 1107.57 |

|                |         |                             |           |              |     |      |                     |         |
|----------------|---------|-----------------------------|-----------|--------------|-----|------|---------------------|---------|
| 23             | DFD     | Troponin T fast skeletal m  | Tnnt3 (2) | Q8MKH7_BOVIN | 62  | 4/13 | YDITNLR             | 894.48  |
|                |         |                             |           |              |     |      | VDFDDIQK            | 979.49  |
|                |         |                             |           |              |     |      | ALSSMGANYSSYLAK     | 1578.77 |
|                |         |                             |           |              |     |      | ALSSMGANYSSYLAKADQK | 2261.17 |
| 24             | DFD     | Troponin T, fast skeletal m | Tnnt3 (3) | TNNT3_BOVIN  | 145 | 7/13 | RAEDDLK             | 846.46  |
|                |         |                             |           |              |     |      | YDITNLR             | 894.47  |
|                |         |                             |           |              |     |      | VDFDDIQK            | 979.48  |
|                |         |                             |           |              |     |      | VDFDDIQKK           | 1107.54 |
|                |         |                             |           |              |     |      | KYDITNLR            | 1150.63 |
|                |         |                             |           |              |     |      | LTAPKIPEGEK         | 1182.61 |
| IPEGEKVDFDDIQK | 1632.81 |                             |           |              |     |      |                     |         |
| 25             | DFD     | Troponin T, fast skeletal m | Tnnt3 (4) | TNNT3_BOVIN  | 60  | 5/13 | YDITNLR             | 894.51  |
|                |         |                             |           |              |     |      | VDFDDIQK            | 979.51  |
|                |         |                             |           |              |     |      | VDFDDIQKK           | 1107.59 |
|                |         |                             |           |              |     |      | ALSSMGANYSSYLAK     | 1578.81 |
| IPEGEKVDFDDIQK | 1632.87 |                             |           |              |     |      |                     |         |
| 26             | DFD     | F-actin-capping protein sut | CAPZA2    | CAZA2_BOVIN  | 74  | 5/16 | QLPVTR              | 713.44  |
|                |         |                             |           |              |     |      | TSVETALR            | 876.49  |
|                |         |                             |           |              |     |      | IGKEMQNA            | 890.48  |
|                |         |                             |           |              |     |      | LLNNDNLLR           | 1197.72 |
|                |         |                             |           |              |     |      | MADLEEQLSDEEKVR     | 1791.84 |
| 27             | Control | Actin, alpha skeletal muscl | ACTA1 (7) | ACTS_BOVIN   | 300 | 7/23 | IIAPPER             | 795.39  |
|                |         |                             |           |              |     |      | GYSFVTTAER          | 1130.46 |
|                |         |                             |           |              |     |      | QEYDEAGPSIVHR       | 1500.60 |
|                |         |                             |           |              |     |      | GYSFVTTAEREIVR      | 1707.63 |
|                |         |                             |           |              |     |      | SYELPDGQVITIGNER    | 1790.73 |
|                |         |                             |           |              |     |      | VAPEEHPTLLTEAPLNPK  | 1955.85 |
|                |         |                             |           |              |     |      | CDEDETTALVCDNGSGLVK | 2082.80 |
| 30             | Control | Troponin T, slow skeletal n | TNNT1 (1) | TNNT1_BOVIN  | 109 | 6/20 | IPEGER              | 700.30  |
|                |         |                             |           |              |     |      | FDLMAK              | 740.30  |
|                |         |                             |           |              |     |      | VDFDDIHR            | 1016.40 |
|                |         |                             |           |              |     |      | ISHAQKFR            | 1066.42 |
|                |         |                             |           |              |     |      | YEINVLYNR           | 1183.51 |
|                |         |                             |           |              |     |      | DLLELQTLIDVHFEQR    | 1968.85 |
| 30A            | DFD     | Troponin T, slow skeletal n | TNNT1 (2) | TNNT1_BOVIN  | 71  | 5/14 | IPEGER              | 700.38  |
|                |         |                             |           |              |     |      | QTGREMK             | 865.53  |
|                |         |                             |           |              |     |      | VDFDDIHR            | 1016.52 |
|                |         |                             |           |              |     |      | ISHAQKFR            | 1066.54 |
|                |         |                             |           |              |     |      | YEINVLYNR           | 1183.66 |
| 33             | Control | Heat shock protein beta-1   | HSPB1 (1) | HSPB1_BOVIN  | 230 | 5/36 | LFDQAFGLPR          | 1163.48 |
|                |         |                             |           |              |     |      | ALPAAAIEGPAYNR      | 1413.57 |
|                |         |                             |           |              |     |      | VSLDVNHFAPPELTVK    | 1797.69 |
|                |         |                             |           |              |     |      | SATQSAEITIPVTFQAR   | 1819.72 |
|                |         |                             |           |              |     |      | AQLGGPEAGKSEQPENK   | 1819.72 |
| 34             | DFD     | Heat shock protein beta-1   | HSPB1 (2) | E1BEL7_BOVIN | 159 | 3/20 | LFDQAFGLPR          | 1163.60 |
|                |         |                             |           |              |     |      | ALPAAAIEGPAYNR      | 1413.71 |
|                |         |                             |           |              |     |      | SATQSAEITIPVTFQAR   | 1819.91 |

|                   |         |                             |           |              |     |       |                    |         |
|-------------------|---------|-----------------------------|-----------|--------------|-----|-------|--------------------|---------|
| 37                | DFD     | Heat shock protein beta-1   | HSPB1 (3) | E1BEL7_BOVIN | 163 | 4/27  | LFDQAFGLPR         | 1163.60 |
|                   |         |                             |           |              |     |       | ALPAAAIEGPAYNR     | 1413.72 |
|                   |         |                             |           |              |     |       | QLSSGVSEIQTADR     | 1618.79 |
|                   |         |                             |           |              |     |       | SATQSAEITIPVTFQAR  | 1819.92 |
| 44                | Control | Myosin, light chain 6B, alk | MYL6B (1) | Q148H2_BOVIN | 109 | 6/26  | VMGAELR            | 791.34  |
|                   |         |                             |           |              |     |       | EAFELYDR           | 1042.41 |
|                   |         |                             |           |              |     |       | IQEPPIDLSK         | 1139.52 |
|                   |         |                             |           |              |     |       | GSYQDYLEGLR        | 1300.49 |
|                   |         |                             |           |              |     |       | ALGQNPTNAEVLRL     | 1382.62 |
| IQEPPIDLSKVVIEFNK | 1968.88 |                             |           |              |     |       |                    |         |
| 46                | Control | Myosin, light chain 6B, alk | MYL6B (2) | Q148H2_BOVIN | 329 | 15/58 | VMGAELR            | 791.34  |
|                   |         |                             |           |              |     |       | VVIEFNK            | 848.41  |
|                   |         |                             |           |              |     |       | DQLEEFK            | 908.37  |
|                   |         |                             |           |              |     |       | HVLTTLGER          | 1025.48 |
|                   |         |                             |           |              |     |       | EAFELYDR           | 1042.39 |
|                   |         |                             |           |              |     |       | VFDKEQNGK          | 1064.45 |
|                   |         |                             |           |              |     |       | IQEPPIDLSK         | 1139.53 |
|                   |         |                             |           |              |     |       | GSYQDYLEGLR        | 1300.50 |
|                   |         |                             |           |              |     |       | IQFSQCGDVMR        | 1356.48 |
|                   |         |                             |           |              |     |       | ALGQNPTNAEVLRL     | 1382.62 |
|                   |         |                             |           |              |     |       | VDFETFLPMLQAVAK    | 1724.72 |
|                   |         |                             |           |              |     |       | VVIEFNKDQLEEFK     | 1737.75 |
|                   |         |                             |           |              |     |       | VELPSLIPVILEKPAK   | 1745.91 |
|                   |         |                             |           |              |     |       | RVDFETFLPMLQAVAK   | 1880.82 |
| DQLEEFKEAFELYDR   | 1931.74 |                             |           |              |     |       |                    |         |
| 50                | Control | Heat shock protein beta-6   | HSPB6     | HSPB6_BOVIN  | 146 | 3/39  | HFSPEEIAVK         | 1156.48 |
|                   |         |                             |           |              |     |       | ASAPLPGLSAPGR      | 1193.54 |
|                   |         |                             |           |              |     |       | LPPGVDPAAVTSALSPE  | 3912.67 |
| 51                | Control | Myosin regulatory light chæ | MYL2 (1)  | MLRV_BOVIN   | 399 | 10/65 | VFDPEGK            | 791.31  |
|                   |         |                             |           |              |     |       | DTFAALGR           | 850.35  |
|                   |         |                             |           |              |     |       | EMLTTQAER          | 1094.40 |
|                   |         |                             |           |              |     |       | NEEIDEMLK          | 1136.38 |
|                   |         |                             |           |              |     |       | DGFIDKNDLR         | 1192.46 |
|                   |         |                             |           |              |     |       | EAFTIMDQNR         | 1240.43 |
|                   |         |                             |           |              |     |       | GADPEETILNAFK      | 1404.53 |
|                   |         |                             |           |              |     |       | EAPGPINFTVFLQMFGE  | 2040.76 |
|                   |         |                             |           |              |     |       | EEIDQMFAAFPDPVTGN  | 2415.82 |
| FSKEEIDQMFAAFPDPV | 2778.03 |                             |           |              |     |       |                    |         |
| 52                | Control | Myosin regulatory light chæ | MYL2 (2)  | F1ME15_BOVIN | 380 | 11/76 | VFDPEGK            | 791.28  |
|                   |         |                             |           |              |     |       | DTFAALGR           | 850.32  |
|                   |         |                             |           |              |     |       | EMLTTQAER          | 1094.36 |
|                   |         |                             |           |              |     |       | NEEIDEMLK          | 1136.35 |
|                   |         |                             |           |              |     |       | DGFIDKNDLR         | 1192.43 |
|                   |         |                             |           |              |     |       | EAFTIMDQNR         | 1240.39 |
|                   |         |                             |           |              |     |       | GADPEETILNAFK      | 1404.50 |
|                   |         |                             |           |              |     |       | EAPGPINFTVFLQMFGEK | 2040.71 |
|                   |         |                             |           |              |     |       | EEIDQMFAAFPDPVTGNL | 2415.77 |

|    |     |                            |           |            |     |       |                        |         |
|----|-----|----------------------------|-----------|------------|-----|-------|------------------------|---------|
|    |     |                            |           |            |     |       | AEGANSNVFSMFEQTQI      | 2420.78 |
|    |     |                            |           |            |     |       | RAEGANSNVFSMFEQTQI     | 2576.86 |
|    |     |                            |           |            |     |       | DTFAAMGR               | 868.35  |
|    |     |                            |           |            |     |       | FSQEEIK                | 880.39  |
|    |     |                            |           |            |     |       | DGIIDKEDLR             | 1173.55 |
|    |     |                            |           |            |     |       | EAFVIDQNR              | 1192.53 |
| 53 | DFD | Myosin regulatory light ch | MYLPF (1) | MLRS_BOVIN | 363 | 10/61 | GADPEDVITGAFK          | 1319.57 |
|    |     |                            |           |            |     |       | FLEELLTQCDR            | 1524.65 |
|    |     |                            |           |            |     |       | LKGADPEDVITGAFK        | 1560.73 |
|    |     |                            |           |            |     |       | EASGPINFTVFLNMFGEK     | 2016.83 |
|    |     |                            |           |            |     |       | AAAEGGSSSVFSMFDQTQIEFF | 2480.95 |
|    |     |                            |           |            |     |       | RAAAEGGSSSVFSMFDQTQIEI | 2716.87 |
|    |     |                            |           |            |     |       | DTFAAMGR               | 884.35  |
| 54 | DFD | Myosin regulatory light ch | MYLPF (2) | MLRS_BOVIN | 88  | 4/23  | DGIIDKEDLR             | 1173.55 |
|    |     |                            |           |            |     |       | EAFVIDQNR              | 1192.53 |
|    |     |                            |           |            |     |       | FLEELLTQCDR            | 1524.64 |

**Table S3** List of GO identifiers and terms (biological process, molecular function and cellular component) obtained by the QuickGo tool for differentially phosphorylated proteins in DFD and control meats

| Protein name                                           | Abbrev. | UniprotKB<br>accession<br>number | Ensemble gene<br>accession number | GO Identifier and GO term name                                                                                                                                                                                                                                                                                                                                                                                                                                                                                                                                                                                                                                                       |
|--------------------------------------------------------|---------|----------------------------------|-----------------------------------|--------------------------------------------------------------------------------------------------------------------------------------------------------------------------------------------------------------------------------------------------------------------------------------------------------------------------------------------------------------------------------------------------------------------------------------------------------------------------------------------------------------------------------------------------------------------------------------------------------------------------------------------------------------------------------------|
| Phosphoglucomutase-1                                   | PGM1    | Q08DP0                           | ENSBTAG00000019011                | <p><b>Process:</b> GO:0005975 (carbohydrate metabolic process)<br/>           GO:0005978 (glycogen biosynthetic process) GO:0006006<br/>           (glucose metabolic process) GO:0019388 (galactose catabolic<br/>           process) GO:0071704 (organic substance metabolic process)<br/> <b>Function:</b> GO:0000287 (magnesium ion binding) GO:0004614<br/>           (phosphoglucomutase activity) GO:0004614<br/>           (phosphoglucomutase activity) GO:0016868 (intramolecular<br/>           transferase activity, phosphotransferases) GO:0046872 (metal<br/>           ion binding) <b>Component:</b> GO:0005737 (cytoplasm)<br/>           GO:0005829 (cytosol)</p> |
| Cytochrome b-c1<br>complex subunit 1,<br>mitochondrial | UQCRC1  | P31800                           | ENSBTAG00000019096                | <p><b>Process:</b> GO:0006122 (mitochondrial electron transport,<br/>           ubiquinol to cytochrome c) GO:0009060 (aerobic respiration)<br/>           GO:0016485 (protein processing) GO:0055114 (oxidation-<br/>           reduction process) <b>Function:</b> GO:0003824 (catalytic activity)<br/>           GO:0004222 (metalloendopeptidase activity) GO:0008270 (zinc</p>                                                                                                                                                                                                                                                                                                  |

ion binding) GO:0046872 (metal ion binding) **Component:**  
GO:0005739 (mitochondrion) GO:0005743 (mitochondrial  
inner membrane) GO:0005750 (mitochondrial respiratory chain  
complex III) GO:0016020 (membrane) GO:0070469  
(respiratory chain)

|              |      |        |                    |                                                                                                                                                                                                                                                                                                                                                                                                                              |
|--------------|------|--------|--------------------|------------------------------------------------------------------------------------------------------------------------------------------------------------------------------------------------------------------------------------------------------------------------------------------------------------------------------------------------------------------------------------------------------------------------------|
| Beta-enolase | ENO3 | Q3ZC09 | ENSBTAG00000005534 | <b>Process:</b> GO:0006096 (glycolytic process) <b>Function:</b><br>GO:0000287 (magnesium ion binding) GO:0004634<br>(phosphopyruvate hydratase activity) GO:0016829 (lyase<br>activity) GO:0046872 (metal ion binding) <b>Component:</b><br>GO:0000015 (phosphopyruvate hydratase complex)<br>GO:0005615 (extracellular space) GO:0005737 (cytoplasm)<br>GO:0005886 (plasma membrane) GO:0070062 (extracellular<br>exosome) |
|--------------|------|--------|--------------------|------------------------------------------------------------------------------------------------------------------------------------------------------------------------------------------------------------------------------------------------------------------------------------------------------------------------------------------------------------------------------------------------------------------------------|

|                                 |       |        |                    |                                                                                                                                                                                                                                                                                                                                                                                                                                                      |
|---------------------------------|-------|--------|--------------------|------------------------------------------------------------------------------------------------------------------------------------------------------------------------------------------------------------------------------------------------------------------------------------------------------------------------------------------------------------------------------------------------------------------------------------------------------|
| Actin, alpha skeletal<br>muscle | ACTA1 | P68138 | ENSBTAG00000046332 | <b>Process:</b> GO:0010628 (positive regulation of gene expression)<br>GO:0030240 (skeletal muscle thin filament assembly)<br>GO:0048741 (skeletal muscle fiber development) GO:0090131<br>(mesenchyme migration) <b>Function:</b> GO:0000166 (nucleotide<br>binding) GO:0005524 (ATP binding) <b>Component:</b> O:0001725<br>stress fiber GO:0005615 (extracellular space) GO:0005737<br>(cytoplasm) GO:0005856 (cytoskeleton) GO:0005865 (striated |
|---------------------------------|-------|--------|--------------------|------------------------------------------------------------------------------------------------------------------------------------------------------------------------------------------------------------------------------------------------------------------------------------------------------------------------------------------------------------------------------------------------------------------------------------------------------|

muscle thin filament) GO:0005884 (actin filament)  
GO:0015629 (actin cytoskeleton) GO:0030017 (sarcomere)  
GO:0030027 (lamellipodium) GO:0030175 (filopodium)  
GO:0044297 (cell body) GO:0070062 (extracellular exosome)  
GO:0072562 (blood microparticle)

Creatin kinase M-type CKM Q9XSC6 ENSBTAG00000013921 **Process:** GO:0009408 (response to heat) GO:0016310 (phosphorylation) GO:0046314 (phosphocreatine biosynthetic process) **Function:** GO:0000166 (nucleotide binding) GO:0003824 (catalytic activity) GO:0004111 (creatine kinase activity) GO:0004111 (creatine kinase activity) GO:0016301 (kinase activity) GO:0016740 (transferase activity) GO:0016772 (transferase activity, transferring phosphorus-containing groups) **Component:** GO:0005615 (extracellular space) GO:0005737 (cytoplasm)

Troponin T, fast skeletal muscle TNNT3 Q8MKI3 ENSBTAG00000022158 **Process:** GO:0003009 (skeletal muscle contraction) GO:0006937 (regulation of muscle contraction) GO:0006942 (regulation of striated muscle contraction) GO:0043462 (regulation of ATPase activity) **Function:** GO:0003779 (actin binding) GO:0005523 (tropomyosin binding) GO:0030172 (troponin C binding) GO:0030899 (calcium-dependent ATPase

activity) GO:0031013 (troponin I binding) GO:0048306  
(calcium-dependent protein binding) **Component:** GO:0005861  
(troponin complex)

|                                                              |        |        |                     |                                                                                                                                                                                                                                                                                                                                     |
|--------------------------------------------------------------|--------|--------|---------------------|-------------------------------------------------------------------------------------------------------------------------------------------------------------------------------------------------------------------------------------------------------------------------------------------------------------------------------------|
| F-actin-capping protein subunit alpha-2                      | CAPZA2 | Q5E997 | ENSBTAG00000004072  | <b>Process:</b> GO:0051016 (barbed-end actin filament capping) GO:0051693 (actin filament capping) <b>Function:</b> GO:0003779 (actin binding) <b>Component:</b> GO:0005903 (brush border) GO:0008290 (F-actin capping protein complex) GO:0016020 (membrane) GO:0030863 (cortical cytoskeleton) GO:0070062 (extracellular exosome) |
| Troponin T, slow skeletal muscle                             | TNNT1  | Q8MKH6 | ENSBTAG00000006419  | <b>Process:</b> GO:0003009 (skeletal muscle contraction) GO:0006937 (regulation of muscle contraction) GO:0014883 (transition between fast and slow fiber) GO:0045932 (negative regulation of muscle contraction) <b>Function:</b> GO:0005523 (tropomyosin binding) <b>Component:</b> GO:0005861 (troponin complex)                 |
| Heat shock protein beta-1                                    | HSPB1  | Q3T149 | ENSBTAG000000011969 | <b>Component:</b> GO:0005634 (nucleus) GO:0005737 (cytoplasm) GO:0005819 (spindle) GO:0005856 (cytoskeleton)                                                                                                                                                                                                                        |
| Myosin, light chain 6B, alkali, smooth muscle and non-muscle | MYL6B  | Q148H2 | ENSBTAG000000031217 | <b>Function:</b> GO:0005509 (calcium ion binding) <b>Component:</b> GO:0070062 (extracellular exosome)                                                                                                                                                                                                                              |



|                                                                              |       |        |                    |                                                                                                                                                                                                                                                                                                                                                                                                       |
|------------------------------------------------------------------------------|-------|--------|--------------------|-------------------------------------------------------------------------------------------------------------------------------------------------------------------------------------------------------------------------------------------------------------------------------------------------------------------------------------------------------------------------------------------------------|
| Heat shock protein<br>beta-6                                                 | HSPB6 | Q148F8 | ENSBTAG00000018598 | <b>Function:</b> GO:0005212 (structural constituent of eye lens)<br>GO:0042803 (protein homodimerization activity) <b>Component:</b><br>GO:0005634 (nucleus) GO:0005737 (cytoplasm)                                                                                                                                                                                                                   |
| Myosin regulatory light<br>chain 2,<br>ventricular/cardiac<br>muscle isoform | MYL2  | Q3SZE5 | ENSBTAG00000018369 | <b>Process:</b> GO:0002026 (regulation of the force of heart<br>contraction) GO:0007507 (heart development) GO:0060047<br>(heart contraction) GO:0098735 (positive regulation of the force<br>of heart contraction) <b>Function</b> GO:0005509 (calcium ion<br>binding) GO:0046872 (metal ion binding) <b>Component:</b><br>GO:0005737 (cytoplasm) GO:0016459 (myosin complex)<br>GO:0031672 (A band) |
| Myosin regulatory light<br>chain 2, skeletal<br>muscle isoform               | MYLPF | Q0P571 | ENSBTAG00000021218 | <b>Process:</b> GO:0007519 (skeletal muscle tissue development)<br><b>Function:</b> GO:0005509 (calcium ion binding) GO:0008307<br>(structural constituent of muscle) GO:0046872 (metal ion<br>binding) <b>Component:</b> GO:0005765 (lysosomal membrane)<br>GO:0016459 (myosin complex)                                                                                                              |

---

**Table S4** Significantly ( $P < 0.05$ ) overrepresented ontologies (present study versus rest of the bovine genome) in DFD and control meat after enrichment analysis by means of the FatiGo software

| Database/GO term                                                | Term size | Term annotation (%)/<br>study vs genome | Protein (abbrev.)       | Odds ratio<br>(log <sub>e</sub> ) | $P$ -value <sup>a</sup> | Adjusted $P$ -value <sup>b</sup> |
|-----------------------------------------------------------------|-----------|-----------------------------------------|-------------------------|-----------------------------------|-------------------------|----------------------------------|
| KEGG/                                                           |           |                                         |                         |                                   |                         |                                  |
| <a href="#">bta01100</a>                                        | 732       | 30.8 vs 3.4                             | PGM1, UQCRC1, ENO3, CKM | 2.52                              | 0.001                   | 0.040                            |
| <a href="#">bta00010</a>                                        | 42        | 15.4 vs 0.3                             | PGM1, ENO3              | 4.56                              | 0.0003                  | 0.037                            |
| <a href="#">bta04260</a>                                        | 48        | 15.4 vs 0.2                             | UQCRC1, MYL2            | 4.42                              | 0.0004                  | 0.037                            |
| <a href="#">bta04530</a>                                        | 75        | 15.4 vs 0.4                             | MYL2, MYLPF             | 3.96                              | 0.001                   | 0.040                            |
| <a href="#">bta04810</a>                                        | 97        | 15.4 vs 0.5                             | MYL2, MYLPF             | 3.69                              | 0.002                   | 0.042                            |
| <a href="#">bta04510</a>                                        | 90        | 15.4 vs 0.4                             | MYL2, MYLPF             | 3.77                              | 0.001                   | 0.042                            |
| <a href="#">bta04670</a>                                        | 79        | 15.4 vs 0.4                             | MYL2, MYLPF             | 3.90                              | 0.001                   | 0.040                            |
| InterPro/                                                       |           |                                         |                         |                                   |                         |                                  |
| <a href="#">Troponin (IPR001978)</a>                            | 5         | 15.4 vs 0.01                            | TNNT3, TNNT1            | 7.15                              | 0.000004                | 0.007                            |
| <a href="#">Alpha crystallin/heat shock protein (IPR001436)</a> | 9         | 15.4 vs 0.03                            | HSPB1, HSPB6            | 6.30                              | 0.00001                 | 0.012                            |

|                                                                           |     |              |                     |      |         |       |
|---------------------------------------------------------------------------|-----|--------------|---------------------|------|---------|-------|
| <a href="#">Heat shock protein Hsp20 (IPR002068)</a>                      | 11  | 15.4 vs 0.04 | HSPB1, HSPB6        | 6.05 | 0.00002 | 0.012 |
| GO cellular component/<br><a href="#">actin cytoskeleton (GO:0015629)</a> | 236 | 23.1 vs 1.1  | CAPZA2, TNNT1, MYL2 | 3.29 | 0.0004  | 0.042 |
| <a href="#">myofibril (GO:0030016)</a>                                    | 59  | 15.4 vs 0.3  | TNNT1, HSPB1        | 4.20 | 0.0006  | 0.042 |
| <a href="#">contractile fiber (GO:0043292)</a>                            | 64  | 15.4 vs 0.3  | TNNT1, HSPB1        | 4.12 | 0.0007  | 0.042 |

---

<sup>a</sup>Probability by two-tailed Fisher probability test. <sup>b</sup>Adjusted *P*-values for multiple testing via false discovery rate (FDR) method. No statistically significant (*P* > 0.05) terms were found for GO biological process and GO molecular function categories

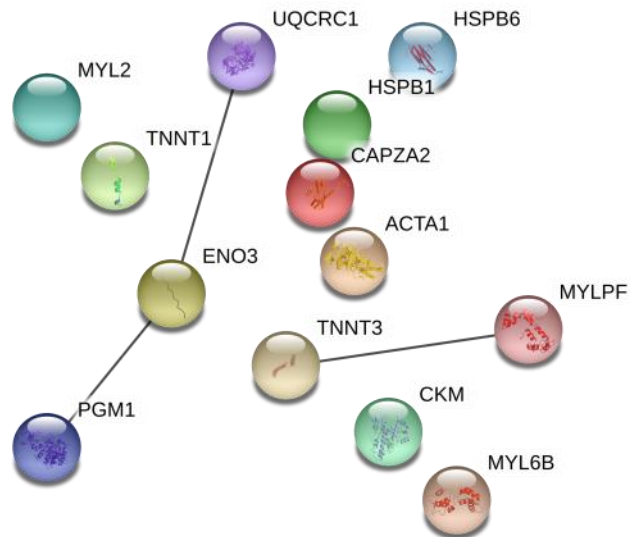

**Fig. S1.** Graph of co-expression networks of differentially phosphorylated proteins in DFD and control bovine meat according to STRING confidence view. The network nodes (circles) are phosphoproteins and the edges represent known or predicted functional associations (Settings: number of interactions to show, none in the first and second shell; threshold: 0.4, medium confidence interval)

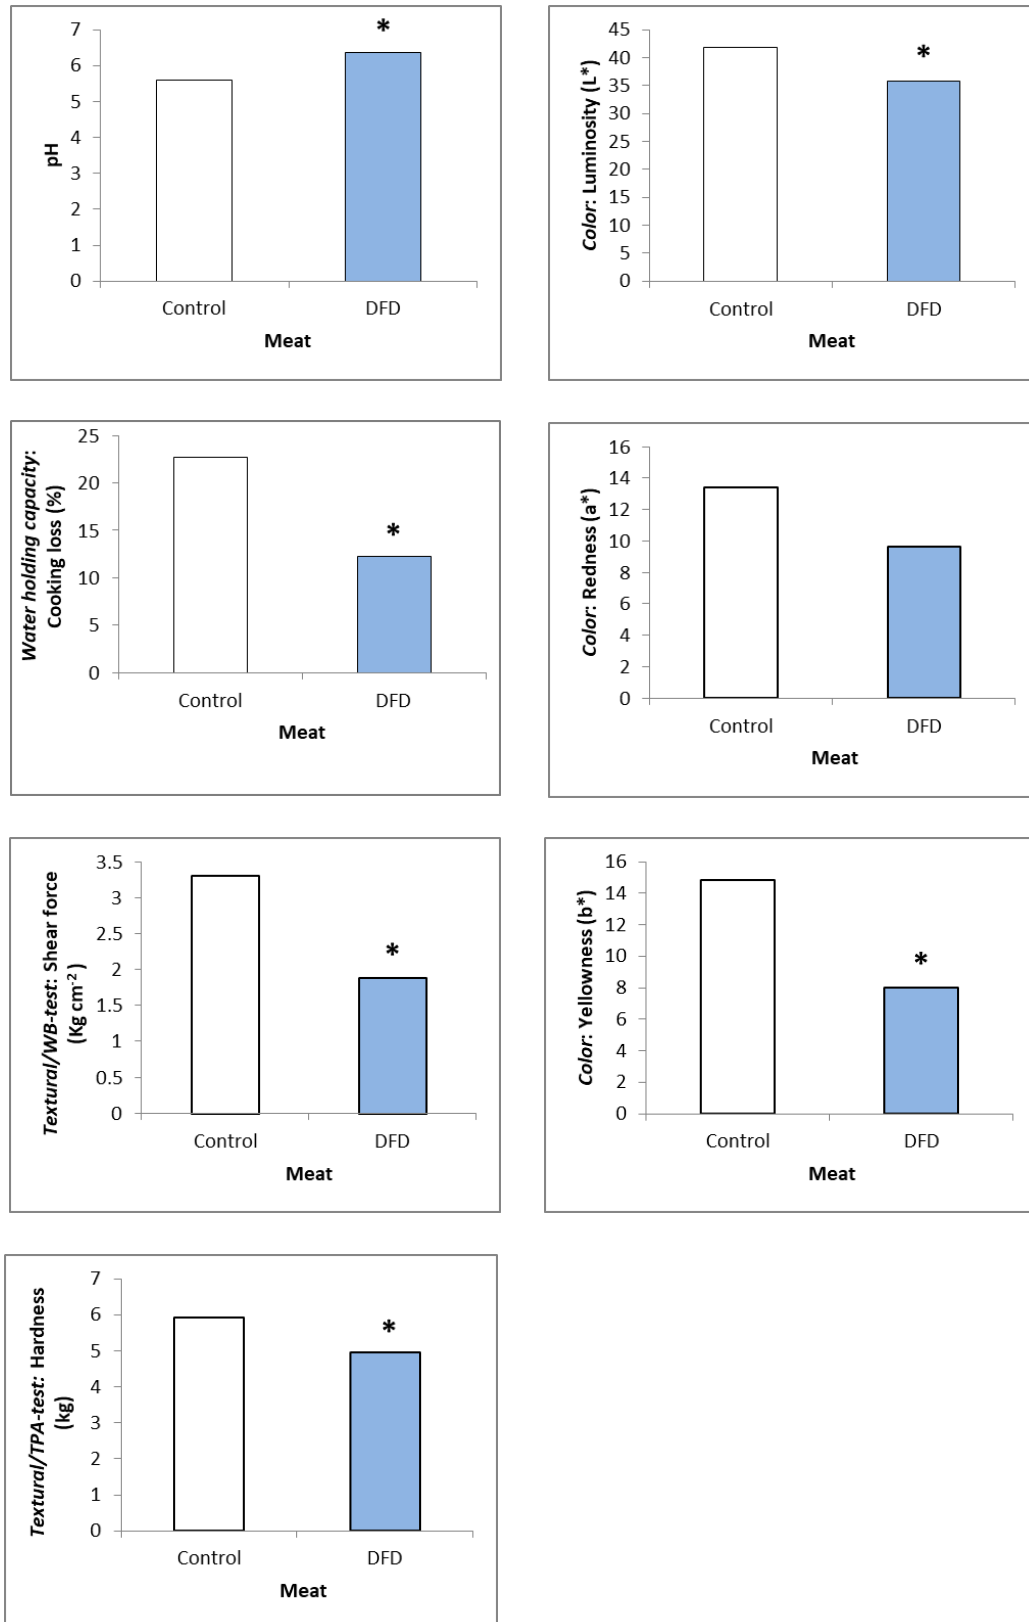

**Figure S2** Mean values of quality parameters (pH, color, water holding capacity and textural parameters) over four biological replicates of DFD and control bovine meat from *longissimus thoracis* muscle [35]. Asterisks indicate statistically significant differences ( $P$ -value < 0.05) between sample groups by the Mann-Whitney U test.
